# Supplementary figures and images for: Direct visualization of spatially correlated displacive short-range ordering in Nb0.8CoSb
Source: Royal Society of Chemistry journal article supplement (doi:10.1039/d0nr04957c), 2020-01-01

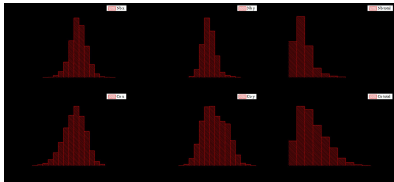

Supplement: d0nr04957c3.pdf [file d0nr04957c3.pdf]

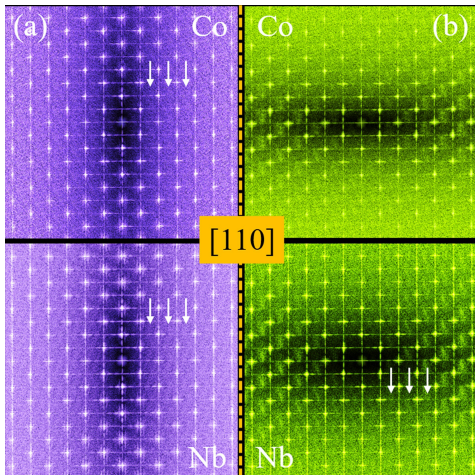

Supplement: d0nr04957c5.pdf [file d0nr04957c5.pdf]
